# Supplementary material
Source: publisher figshare collection journal article supplement (https://acs.figshare.com/ndownloader/files/14173202)
Supplement: Supplementary file 1 [file 14173202]

*Supporting Information for*

**Broadening Frontiers of Infrared Nonlinear Optical  
Materials with  $\pi$ -Conjugated Trigonal Planar Groups**

Zhuang Li,<sup>a,b,c</sup> Yi Yang,<sup>a,c</sup> Yangwu Guo,<sup>a,b,c</sup> Wenhao Xing,<sup>a,b,c</sup> Xiaoyu Luo,<sup>a,b,c</sup> Zheshuai Lin,<sup>a</sup> Jiyong Yao,<sup>a,b,\*</sup>  
Yicheng Wu<sup>a,d</sup>

<sup>a</sup> Center for Crystal Research and Development, Key Lab Functional Crystals and Laser Technology of Chinese Academy of Sciences, Technical Institute of Physics and Chemistry, Chinese Academy of Sciences, Beijing 100190, PR China

<sup>b</sup> Center of Materials Science and Optoelectronics Engineering, University of Chinese Academy of Sciences, Beijing 100049, P. R. China

<sup>c</sup> University of Chinese Academy of Sciences, Beijing 100190, PR China

<sup>d</sup> Institute of Functional Crystal Materials, Tianjin University of Technology, Tianjin 300384, P.R. China

\*Corresponding author:

Jiyong Yao; jyao@mail.ipc.ac.cn.

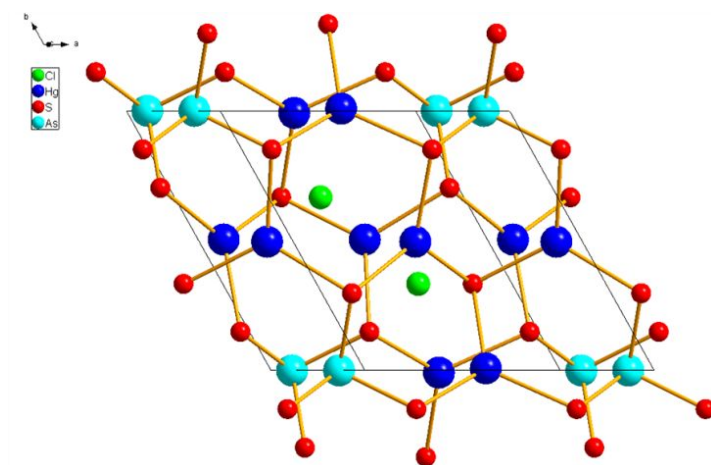

**Figure S1.** Crystal structure of  $\text{Hg}_3\text{AsS}_4\text{Cl}$ .

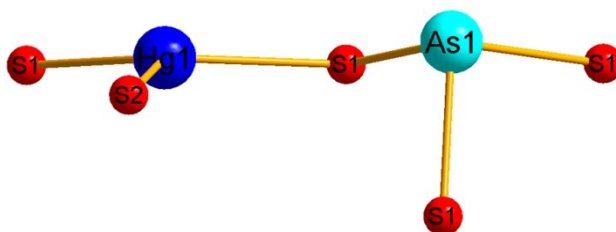

**Figure S2.** Coordination environment of  $\text{Hg}^{2+}$  and  $\text{As}^{3+}$  in  $\text{Hg}_3\text{AsS}_4\text{Cl}$ .

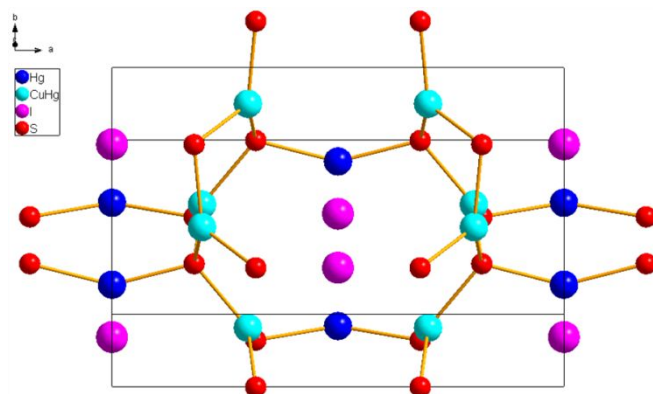

**Figure S3.** Crystal structure of  $\text{CuHg}_2\text{S}_2\text{I}$ .

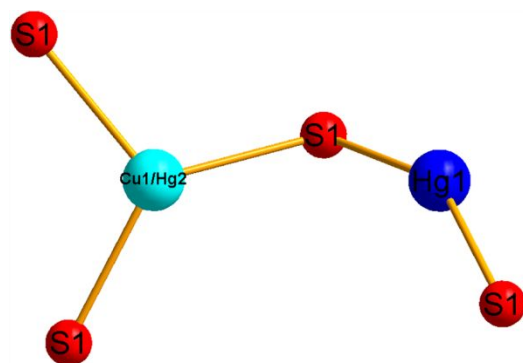

**Figure S4.** Coordination environment of  $\text{Cu1}^+/\text{Hg2}^{2+}$  and  $\text{Hg1}^{2+}$  in  $\text{CuHg}_2\text{S}_2\text{I}$ .

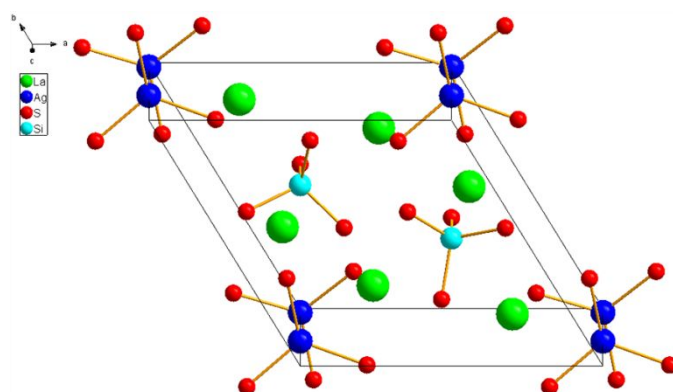

**Figure S5.** Crystal structure of  $\text{La}_3\text{AgSiS}_7$ .

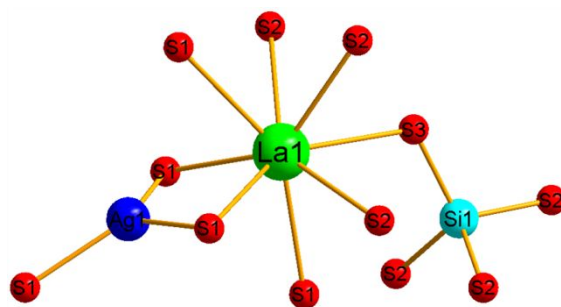

**Figure S6.** Coordination environment of  $\text{Ag}^+$ ,  $\text{La}^{3+}$  and  $\text{Si}^{4+}$  in  $\text{La}_3\text{AgSiS}_7$ .

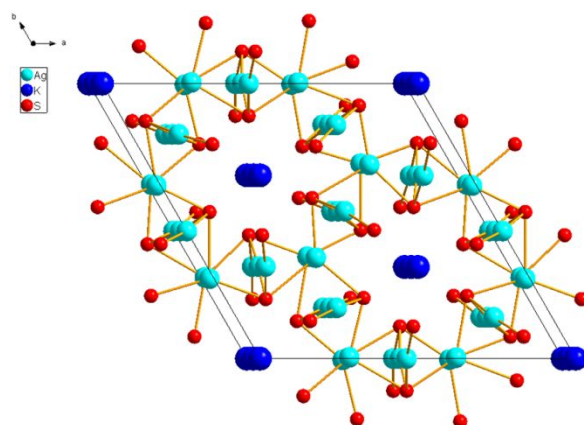

**Figure S7.** Crystal structure of  $\text{KAg}_5\text{S}_3$ .

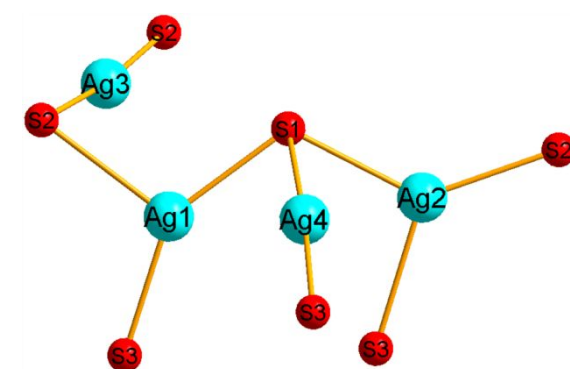

**Figure S8.** Coordination environment of  $\text{Ag}^+$  in  $\text{KAg}_5\text{S}_3$ .

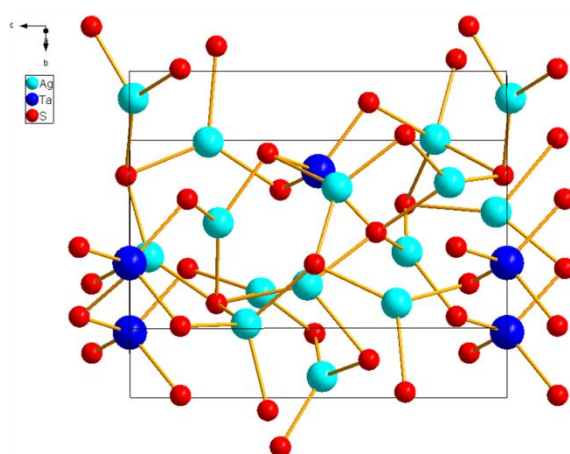

**Figure S9.** Crystal structure of  $\text{Ag}_7\text{TaS}_6$  ( $Pn$  space group).

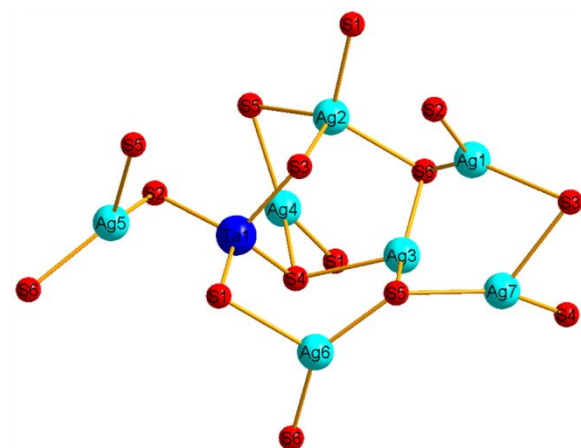

**Figure S10.** Coordination environment of  $\text{Ag}^+$  and  $\text{Ta}^{5+}$  in  $\text{Ag}_7\text{TaS}_6$ .

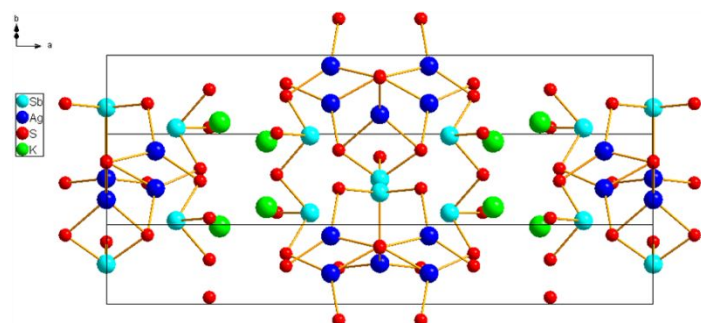

**Figure S11.** Crystal structure of  $\text{K}_2\text{Ag}_3\text{Sb}_3\text{S}_7$ .

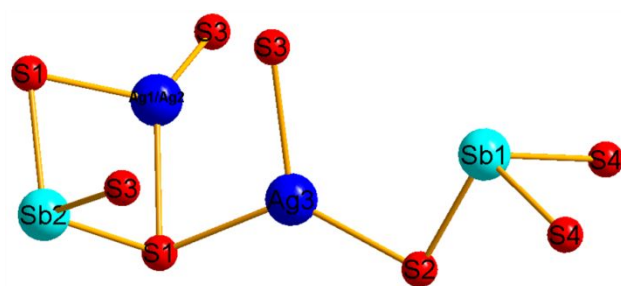

**Figure S12.** Coordination environment of  $\text{Ag}^+$  and  $\text{Sb}^{3+}$  in  $\text{K}_2\text{Ag}_3\text{Sb}_3\text{S}_7$ .

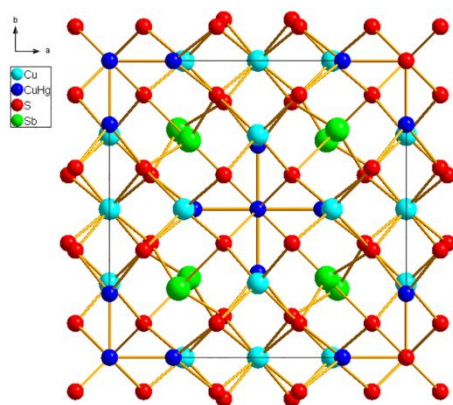

**Figure S13.** Crystal structure of  $\text{Cu}_{10}\text{Hg}_2\text{Sb}_4\text{S}_{13}$ .

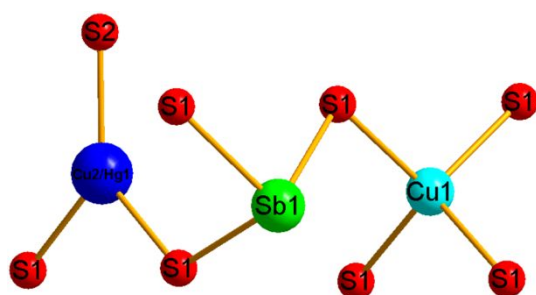

**Figure S14.** Coordination environment of  $(\text{Cu}^{2+}/\text{Hg}^{12+})$ 、 $\text{Sb}^{3+}$ 和  $\text{Cu}^{1+}$  in  $\text{Cu}_{10}\text{Hg}_2\text{Sb}_4\text{S}_{13}$ .

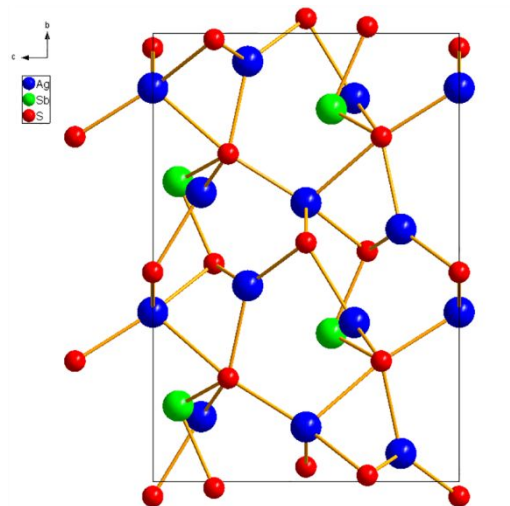

**Figure S15.** Crystal structure of  $\text{Ag}_5\text{SbS}_4$ .

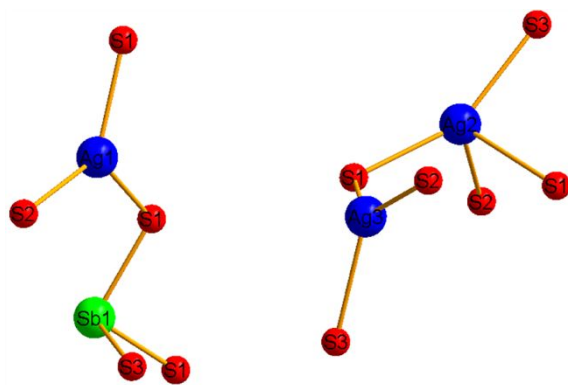

**Figure S16.** Coordination environment of  $\text{Ag}^+$  and  $\text{Sb}^{3+}$  in  $\text{Ag}_5\text{SbS}_4$ .

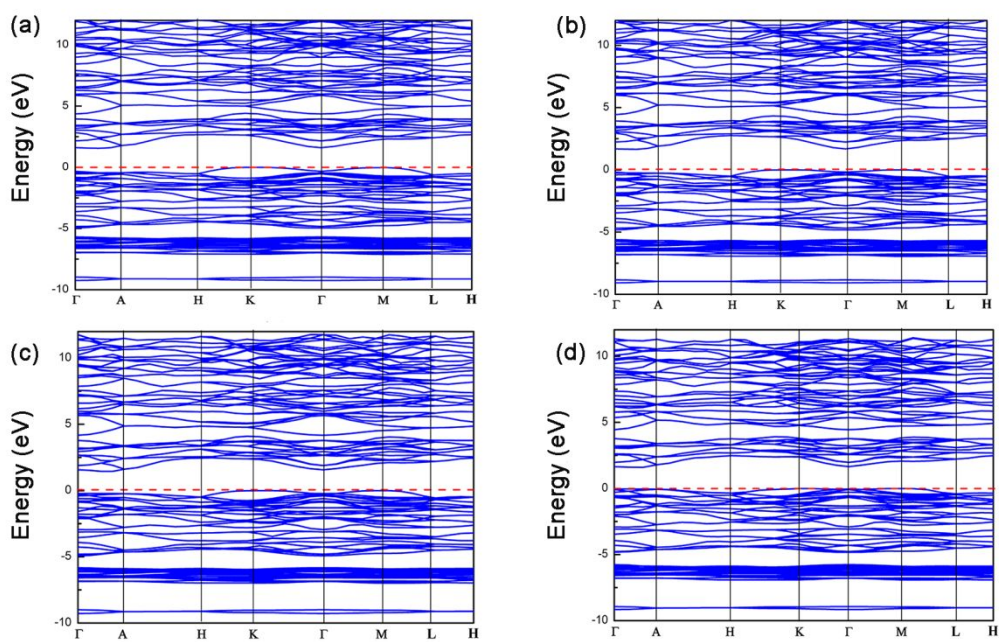

**Figure S17.** Electronic band structure of  $\text{Hg}_3\text{AsS}_4\text{Cl}$  (a),  $\text{Hg}_3\text{AsS}_4\text{Br}$  (b),  $\text{Hg}_3\text{AsSe}_4\text{Br}$  (c),  $\text{Hg}_3\text{AsSe}_4\text{I}$  (d).

**Table S1.** Band gap, the second-order polarization tensor and the contribution of different building blocks to NLO effect of  $\text{Hg}_3\text{AsQ}_4\text{X}$  (Q = S, Se; X = Cl, Br, I).

|                                     | $E_g$<br>(Sx-LDA) | $E_g$ (GGA) | SHG tensors                            | $[\text{Hg}(\text{S/Se})_3]$<br>trigonal<br>planar unit | $[\text{As}(\text{S/Se})_3]$<br>pyramidal |
|-------------------------------------|-------------------|-------------|----------------------------------------|---------------------------------------------------------|-------------------------------------------|
| $\text{Hg}_3\text{AsS}_4\text{Cl}$  | 1.975             | 1.550       | $d_{31} = 11.029$<br>$d_{33} = -6.939$ | $d_{31} = 12.561$<br>$d_{33} = 0.162$                   | $d_{31} = 5.855$<br>$d_{33} = -4.865$     |
| $\text{Hg}_3\text{AsS}_4\text{Br}$  | 2.020             | 1.653       | $d_{31} = 13.93$<br>$d_{33} = -4.88$   | $d_{31} = 14.94$<br>$d_{33} = 1.145$                    | $d_{31} = 7.535$<br>$d_{33} = -2.871$     |
| $\text{Hg}_3\text{AsSe}_4\text{Br}$ | 1.792             | 1.447       | $d_{31} = 21.117$<br>$d_{33} = -4.318$ | $d_{31} = 23.406$<br>$d_{33} = 5.417$                   | $d_{31} = 10.328$<br>$d_{33} = -4.014$    |
| $\text{Hg}_3\text{AsSe}_4\text{I}$  | 1.875             | 1.598       | $d_{31} = 27.993$<br>$d_{33} = 3.088$  | $d_{31} = 26.992$<br>$d_{33} = 8.575$                   | $d_{31} = 13.038$<br>$d_{33} = 0.772$     |

**Table S2.** Space group, SHG coefficient and birefringence of several benchmark crystals and compounds that contain trigonal planar units (marked in red).

| Compounds                    | Space group   | $d_{ij}$ (pm/V) | $\Delta n$ |
|------------------------------|---------------|-----------------|------------|
| $\text{AgGaS}_2$             | $I \bar{4}2d$ | 13.4            | 0.034      |
| $\text{BaGa}_4\text{S}_7$    | $Pmn2_1$      | 16.6            | 0.063      |
| $\text{BaGa}_4\text{Se}_7$   | $Pc$          | 24              | 0.06       |
| $\text{BaGa}_2\text{GeS}_6$  | $R3$          | 12.0            | 0.068      |
| $\text{BaGa}_2\text{GeSe}_6$ | $R3$          | 27.4            | 0.15       |
| $\text{LiGaGe}_2\text{Se}_6$ | $Fdd2$        | 18.6            | 0.04       |
| $\text{BaHgSe}_2$            | $Pmc2_1$      | 39.87           | 0.1649     |
| $\text{Ag}_6\text{HgSiSe}_6$ | $Pmn2_1$      | 43.22           | 0.233      |
| $\text{Ag}_6\text{HgGeSe}_6$ | $Pmn2_1$      | 21.36           | 0.207      |
